# Supplementary material for: Optimization of potential non-covalent inhibitors for the SARS-CoV-2 main protease inspected by a descriptor of the subpocket occupancy
Source: Royal Society of Chemistry journal article supplement (doi:10.1039/d2cp03681a), 2022-01-01
Supplement: d2cp03681a1.pdf [file d2cp03681a1.pdf]

# Supporting Information for: Optimization of Potential Non-covalent Inhibitors for SARS-CoV-2 Main Protease Inspected by a Descriptor of Subpocket Occupancy

Yujia Sun <sup>a</sup>, Bodi Zhao <sup>a</sup>, Yuqi Wang <sup>a</sup>, Zitong Chen <sup>a</sup>, Huaiyu Zhang <sup>b</sup>, Lingbo Qu <sup>a</sup>, Yuan Zhao <sup>\*c</sup>, Jinshuai Song <sup>\*a</sup>

<sup>a</sup> Green Catalysis Center, and College of Chemistry, Zhengzhou University, No. 100 Science Avenue, Zhengzhou, Henan 450001, P. R. China

<sup>b</sup> Institute of Computational Quantum Chemistry, College of Chemistry and Materials Science, Hebei Normal University, Shijiazhuang, Hebei 050024, P. R. China

<sup>c</sup> The Key Laboratory of Natural Medicine and Immuno-Engineering, Henan University, Kaifeng, Henan 475000, P. R. China

E-mail: [jssong@zzu.edu.cn](mailto:jssong@zzu.edu.cn); [zhaoyuan@henu.edu.cn](mailto:zhaoyuan@henu.edu.cn)

## Content

|                                                                                                                                |    |
|--------------------------------------------------------------------------------------------------------------------------------|----|
| Supporting Information for: Simulation and optimization of potential non-covalent inhibitor for SARS-CoV-2 Main Protease ..... | 1  |
| Part 1: Functions of 13 Marketed Drugs .....                                                                                   | 2  |
| Part 2: Docking Results .....                                                                                                  | 3  |
| Part 3: Molecular Dynamics Simulations Results and Free-Energy Calculations .....                                              | 5  |
| Part 4: Physicochemical properties and ADME analysis .....                                                                     | 20 |
| Part 5: Simplified Molecular Input Line Entry System .....                                                                     | 22 |

## Part1: Functions of 13 Marketed Drugs

Adrafinil, a psychostimulant that activates the postsynaptic  $\alpha 1$  adrenergic receptors of the central nervous system. Bromefric acid, a medicine for the treatment of neurological disorders. Fusidic acid is an antibiotic with steroidal skeleton, which is highly sensitive to various gram-positive cocci, especially staphylococci. LSN-2463359 is a positive allosteric modulator of metabotropic glutamate 5 (mGlu5), which can attenuate behavioral response after the administration of competitive NMDA receptor antagonists. MUT056399 is a highly potent inhibitor of the FabI enzyme of both *Staphylococcus aureus* and *Escherichia coli*. Necrostatin-1 (Nec-1) effectively inhibits TNF $\alpha$ -induced necrotic death of L929 cells and prevents radiocontrast media (RCM)-induced dilation of peritubular capillaries. Nec-1 is a potent necroptosis inhibitor, RIP1 kinase inhibitor and IDO inhibitor. Polydatin, the glycoside of Resveratrol, can inhibit ICAM-1 expression, elevate  $Ca^{2+}$ , weaken white blood cell–endothelial cell adhesion, and activate KATP channels in the myocardial cell, white blood cell, vascular smooth muscle cell, and endothelial cell. SEN-1269, a novel inhibitor of amyloid-beta toxicity. AZD6482 is a selective inhibitor that blocks the interaction of ATP with PI3K $\beta$  and inhibits platelet aggregation induced by low concentrations of agonists. SUN-B-8155 is a non–peptide agonist of the calcitonin receptor which selectively mimics the biological effects of calcitonin. Clonidine is an alpha 2-adrenergic agonist and it can suppress the firing activity of neurons. UNC2327 is an allosteric inhibitor of protein arginine methyltransferase 3 (PRMT3). Tretazicar, an antitumor prodrug, is highly selective against the Walker 256 rat tumour line which has sensitivity for retrovirally transduced AB22 (AB22-nr) cells.

## Part 2: Docking Results

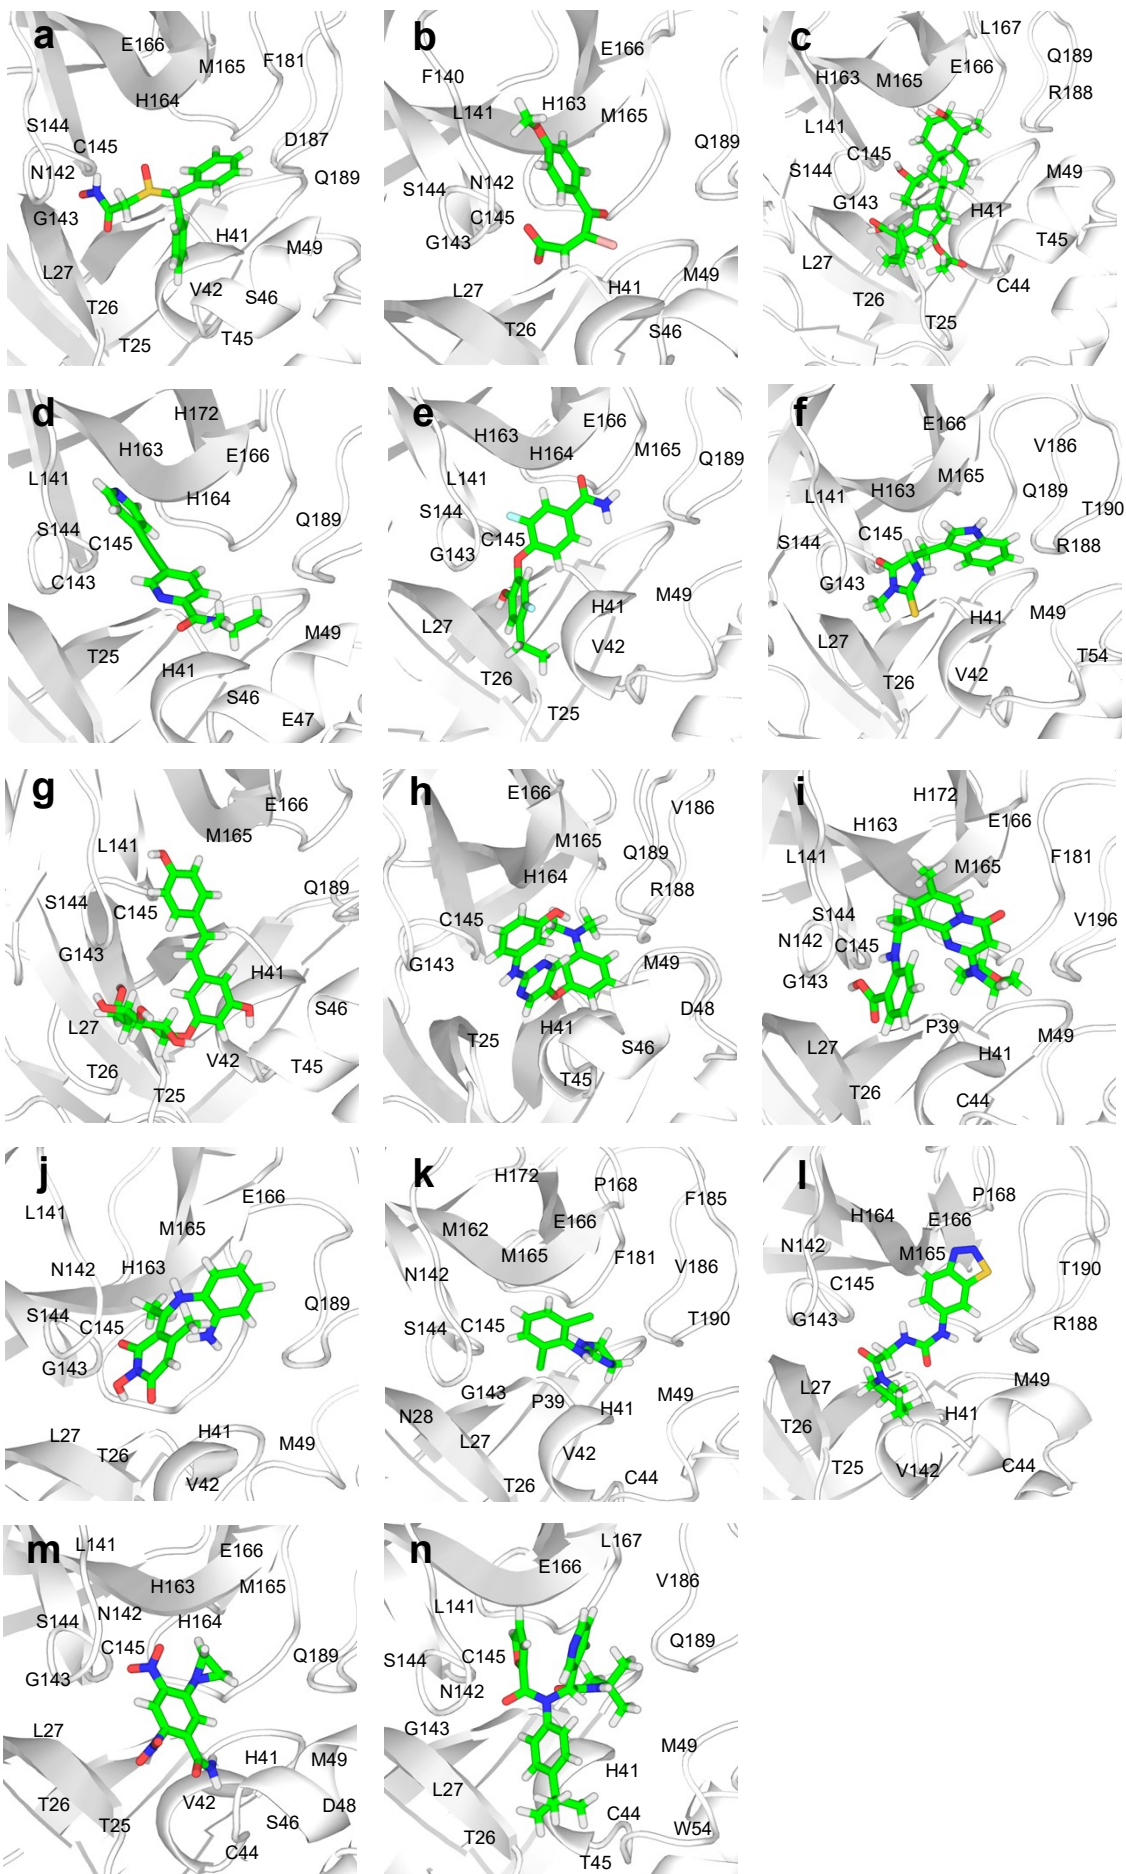

**Fig. S1** Docking of 13 selected compounds and inhibitor ML188 in the pocket of the Mpro: (a) adrafinil; (b) bromebric; (c) Fusidic Acid; (d) LSN-2463359; (e) MUT056399; (f) necrostatin-1; (g) polydatin; (h) polydatin; (i) AZD6482; (j) SUN-B-8155; (k) clonidine; (l) UNC-2327; (m) tretazicar; (n) ML188

## Part 3: Molecular Dynamics Simulations Results and Free-Energy Calculations

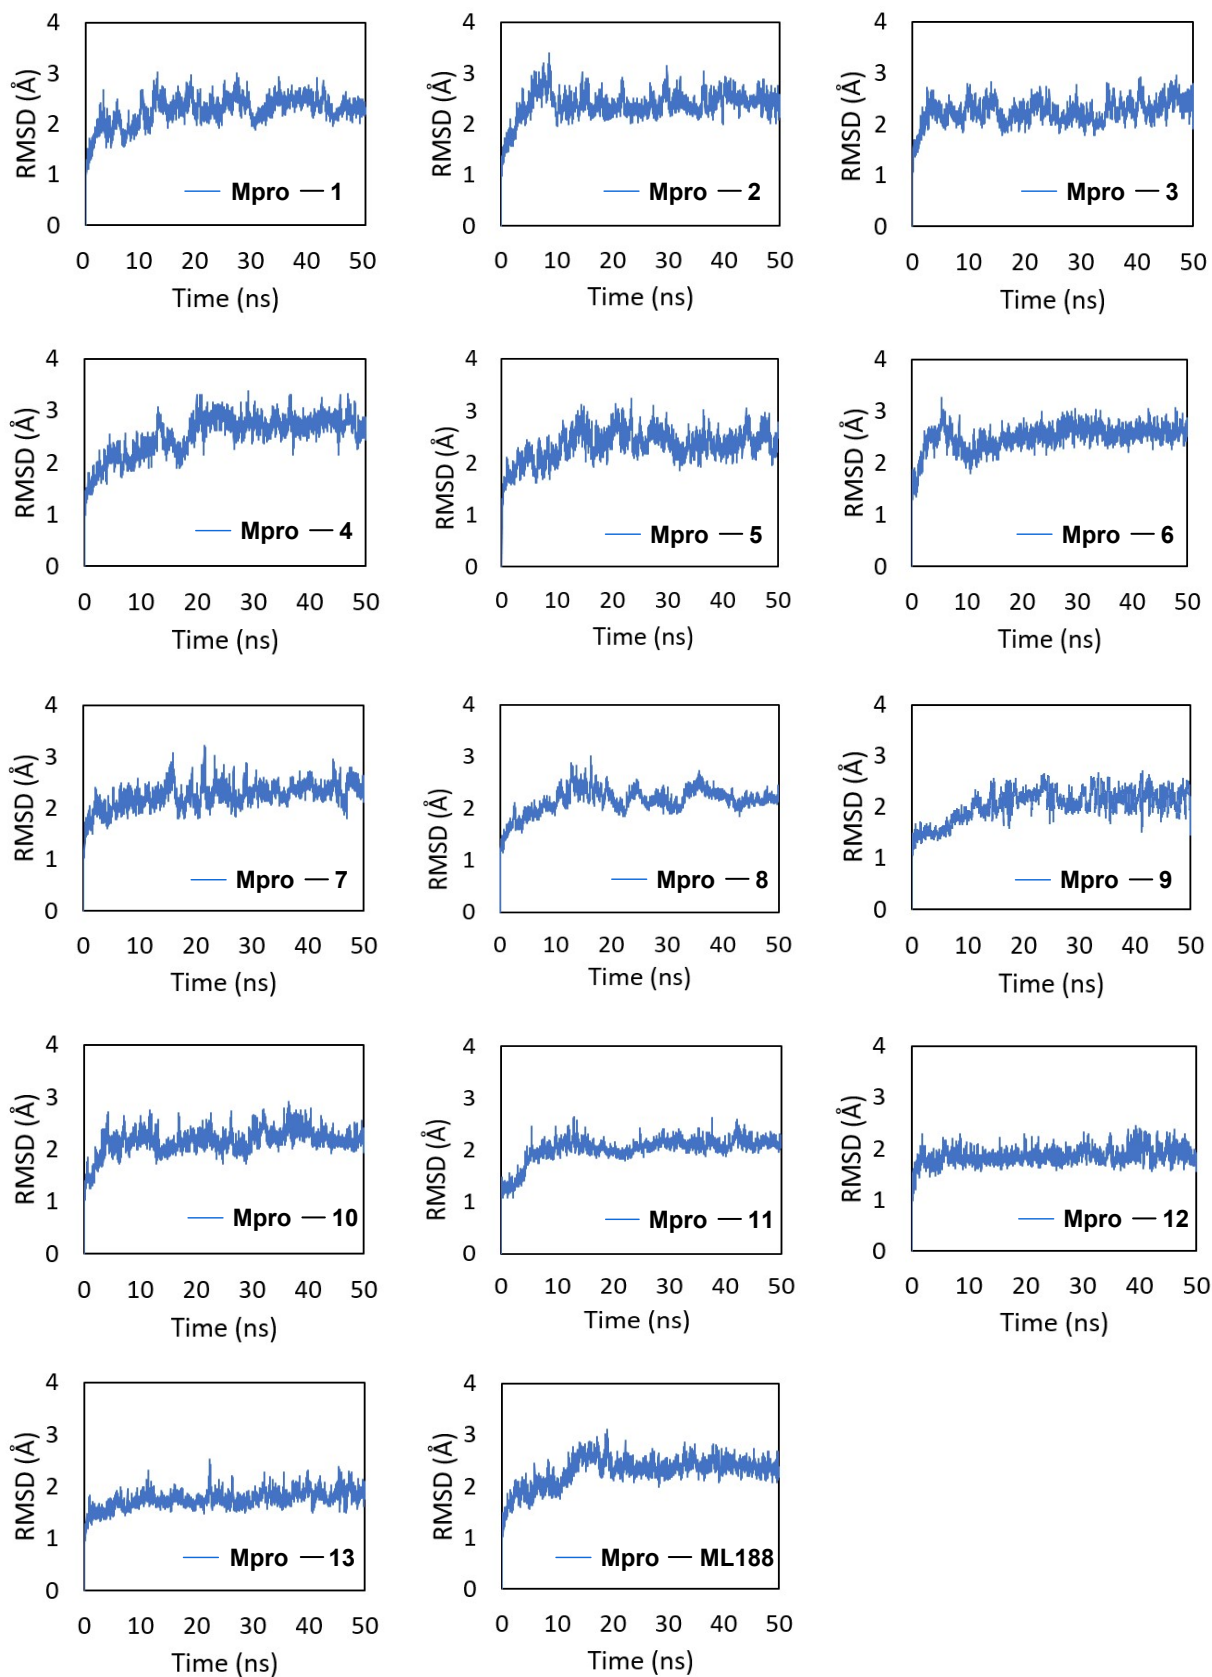

**Fig. S2** Graphical representation of the RMSD for for each ligand in complex with Mpro protein during 50 ns molecular dynamics simulations.

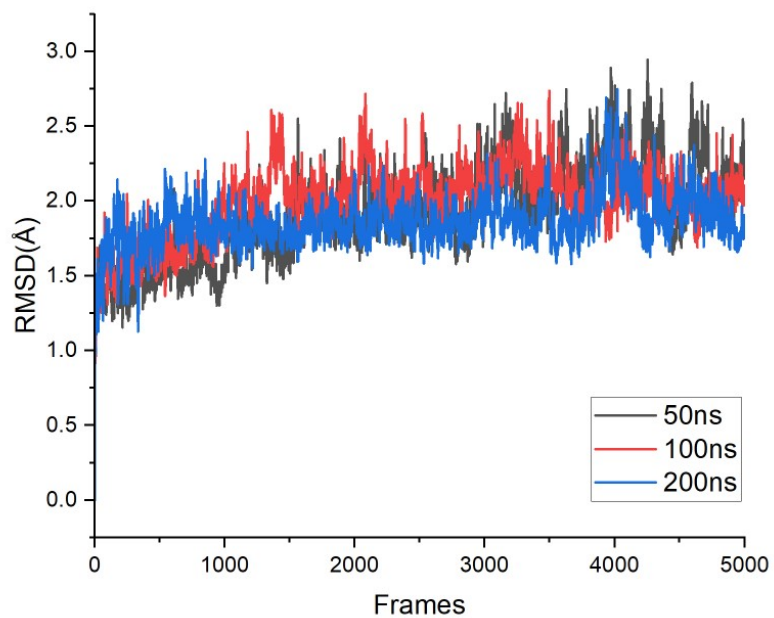

**Fig. S3** Graphical representation of the RMSD during 50 ns, 100 ns and 200ns of MD simulation for compound **12**.

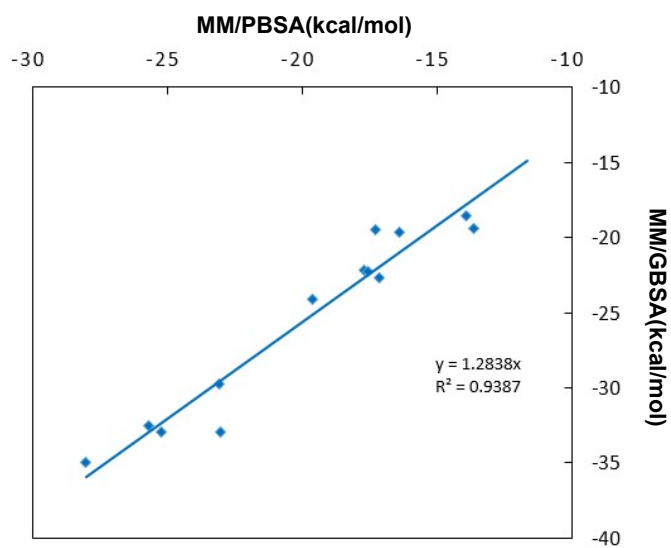

**Fig. S4** The linear relationship between binding energies of  $\Delta G_{\text{MM/PBSA}}$  and  $\Delta G_{\text{MM/GBSA}}$ .

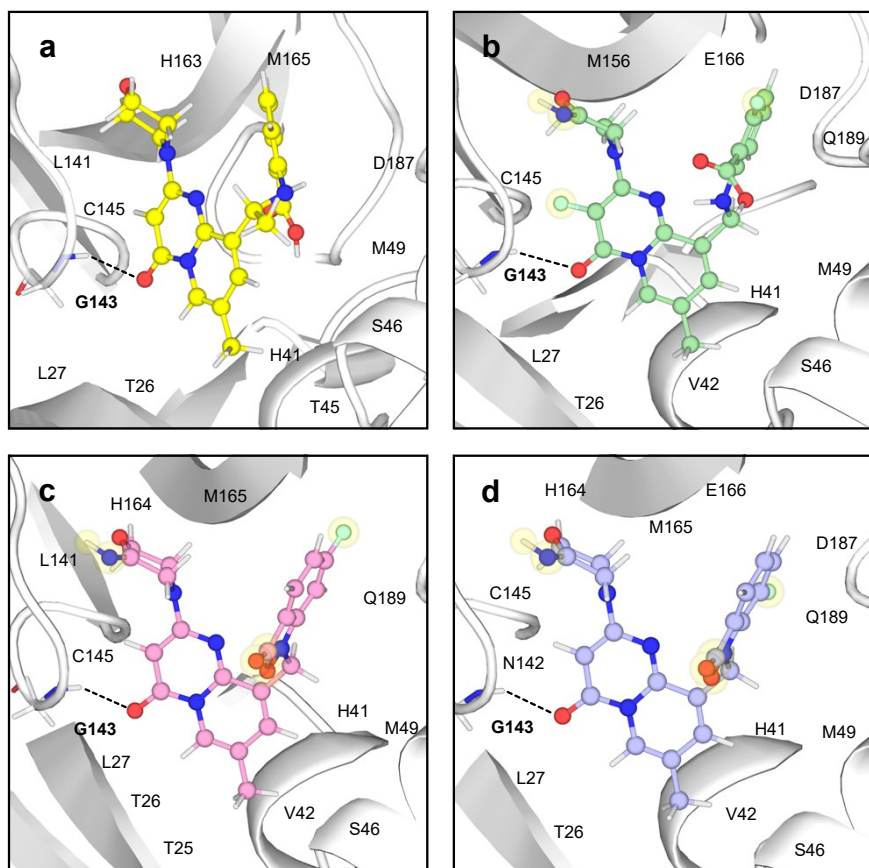

**Fig. S5** Representative snapshot of 3 Mpro-novel ligand complexes. Compared with **9**, the optimized groups in the novel lead compounds are highlighted in yellow sphere.

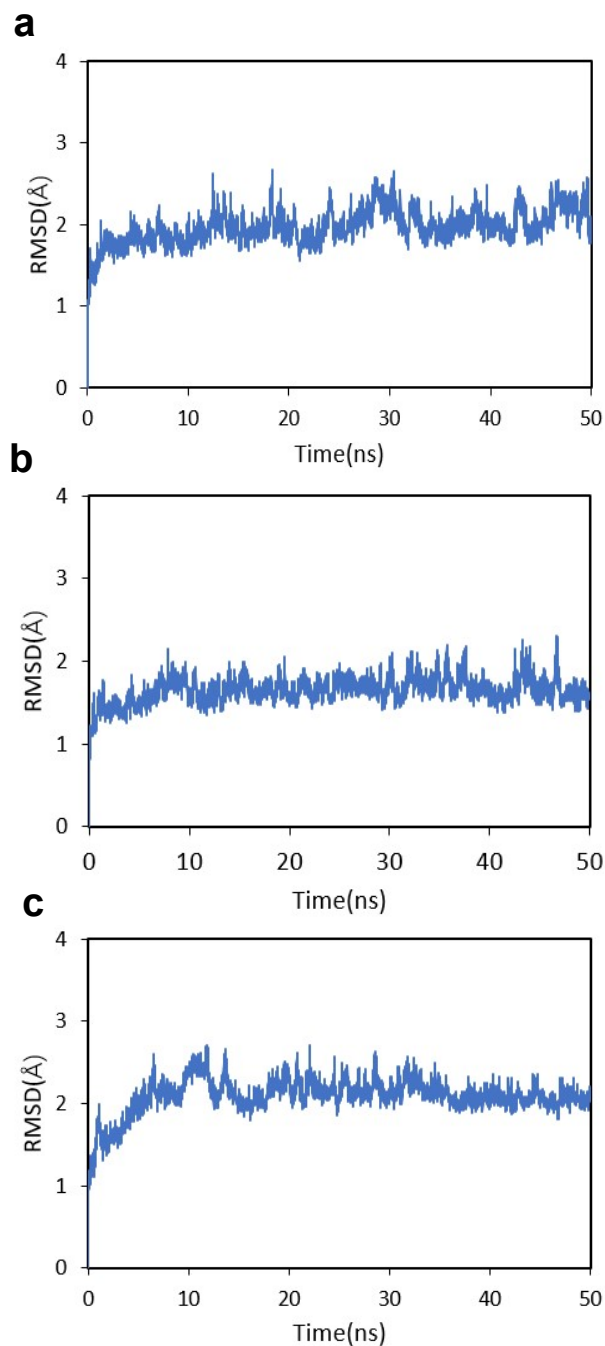

**Fig. S6** Graphical representation of the RMSD during 50 ns of MD simulation for Mpro with lead compound (a) **L1** (b) **L2** (c) **L3** complexes.



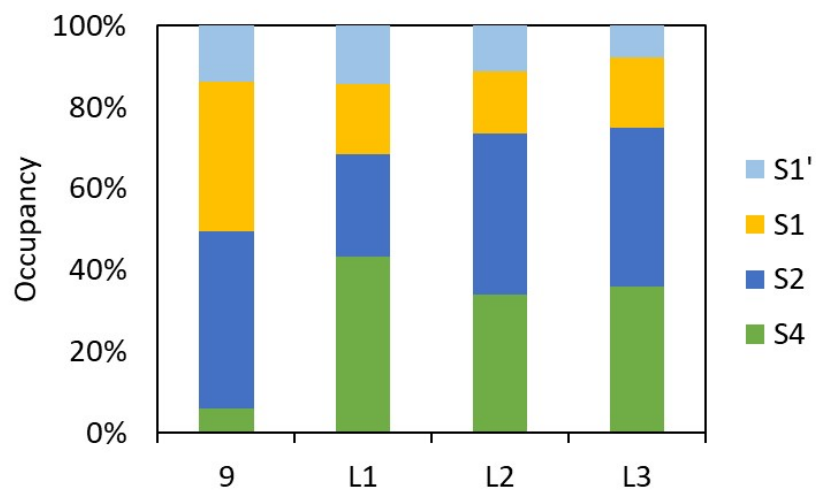

**Fig. S7** Occupancy percentage of compound **9** and three novel lead compound in four subpockets.

**Table S1** Average RMSD values (Å) for 13 selected compounds.

| Compound | 1   | 2   | 3   | 4   | 5   | 6   | 7   | 8   | 9   | 10  | 11  | 12  | 13  | L1  | L2  | L3  |
|----------|-----|-----|-----|-----|-----|-----|-----|-----|-----|-----|-----|-----|-----|-----|-----|-----|
| RMSD(Å)  | 2.5 | 2.1 | 2.1 | 1.8 | 2.3 | 2.1 | 2.4 | 2.1 | 1.8 | 2.2 | 2.0 | 2.3 | 2.0 | 2.0 | 1.6 | 2.1 |

**Table S2** Relative binding energies of the compound **12** using different frames (energies in kcal/mol).

| Frames | $\Delta E_{\text{vdw}}$ | $\Delta E_{\text{EEL}}$ | $\Delta E_{\text{EPB}}$ | $\Delta E_{\text{ENPOLAR}}$ | $\Delta G_{\text{MM/PBSA}}$ | $\Delta G_{\text{MM/GBSA}}$ |
|--------|-------------------------|-------------------------|-------------------------|-----------------------------|-----------------------------|-----------------------------|
| 50     | -41.57                  | -16.01                  | 30.75                   | -3.24                       | -30.08                      | -38.23                      |
| 100    | -40.43                  | -13.27                  | 28.68                   | -3.26                       | -28.27                      | -36.11                      |
| 200    | -40.21                  | -13.60                  | 28.82                   | -3.24                       | -28.24                      | -35.91                      |
| 500    | -40.38                  | -13.24                  | 28.73                   | -3.24                       | -28.13                      | -35.82                      |

**Table S3** Relative binding energies of compound **12** during 50 ns,100 ns and 200ns of MD simulation (energies in kcal/mol).

| Time(ns) | $\Delta E_{\text{vdw}}$ | $\Delta E_{\text{EEL}}$ | $\Delta E_{\text{EPB}}$ | $\Delta E_{\text{ENPOLAR}}$ | $\Delta G_{\text{MM/PBSA}}$ | $\Delta G_{\text{MM/GBSA}}$ |
|----------|-------------------------|-------------------------|-------------------------|-----------------------------|-----------------------------|-----------------------------|
| 50       | -40.43                  | -13.27                  | 28.68                   | -3.26                       | -28.27                      | -36.11                      |
| 100      | -39.84                  | -13.99                  | 28.70                   | -3.18                       | -28.31                      | -35.52                      |
| 200      | -39.18                  | -14.03                  | 28.65                   | -3.16                       | -28.06                      | -34.80                      |

**Table S4** MM/PB(GB)SA binding free energies along with its constituent energies for the selected compounds and three novel lead compounds in eight MD simulations (energies in kcal/mol).

| Compound | $\Delta E_{\text{vdw}}$ | $\Delta E_{\text{EEL}}$ | $\Delta E_{\text{EPB}}$ | $\Delta E_{\text{ENPOLAR}}$ | $\Delta G_{\text{MM/PBSA}}$ | $\Delta G_{\text{MM/GBSA}}$ |
|----------|-------------------------|-------------------------|-------------------------|-----------------------------|-----------------------------|-----------------------------|
| 1        | -29.20                  | -9.07                   | 26.76                   | -3.03                       | -14.53                      | -16.62                      |
|          | -29.35                  | -11.72                  | 30.81                   | -3.07                       | -13.34                      | -17.06                      |
|          | -31.08                  | -21.80                  | 43.26                   | -3.07                       | -12.69                      | -18.87                      |
|          | -29.72                  | -17.75                  | 38.13                   | -3.09                       | -12.43                      | -17.86                      |
|          | -25.65                  | -39.50                  | 53.64                   | -2.98                       | -14.49                      | -18.45                      |
|          | -32.41                  | -20.10                  | 40.93                   | -3.19                       | -14.76                      | -19.55                      |
|          | -29.45                  | -39.01                  | 55.65                   | -3.17                       | -15.98                      | -21.98                      |
|          | -30.57                  | -11.81                  | 32.40                   | -3.15                       | -13.12                      | -17.75                      |
| 2        | -23.00                  | -0.39                   | 11.25                   | -2.44                       | -14.58                      | -18.43                      |
|          | -23.75                  | -8.51                   | 6.68                    | -2.28                       | -10.83                      | -15.90                      |
|          | -22.46                  | -6.56                   | 19.57                   | -2.31                       | -11.76                      | -19.52                      |
|          | -24.25                  | -4.94                   | 10.00                   | -2.40                       | -11.71                      | -17.07                      |
|          | -11.15                  | -19.35                  | 17.95                   | -1.60                       | -14.15                      | -17.63                      |
|          | -24.75                  | -12.35                  | 23.16                   | -2.47                       | -16.40                      | -24.35                      |
|          | -25.54                  | -9.56                   | 20.47                   | -2.48                       | -17.12                      | -23.05                      |
|          | -24.59                  | -2.09                   | 16.63                   | -2.35                       | -12.40                      | -19.22                      |
| 3        | -42.45                  | -6.41                   | 27.57                   | -4.08                       | -25.36                      | -34.43                      |
|          | -44.69                  | -2.62                   | 23.05                   | -4.00                       | -28.26                      | -34.03                      |
|          | -45.97                  | -5.74                   | 28.53                   | -4.41                       | -27.60                      | -34.66                      |
|          | -34.40                  | -9.59                   | 24.43                   | -3.61                       | -23.17                      | -27.01                      |
|          | -50.96                  | -1.47                   | 26.91                   | -4.61                       | -30.13                      | -39.46                      |
|          | -47.67                  | -6.54                   | 28.46                   | -4.47                       | -30.22                      | -37.91                      |
|          | -47.59                  | -5.23                   | 28.71                   | -4.43                       | -28.54                      | -36.87                      |
|          | -45.59                  | -1.68                   | 20.88                   | -4.43                       | -30.82                      | -35.57                      |
| 4        | -32.44                  | -2.97                   | 18.16                   | -2.67                       | -19.92                      | -26.91                      |
|          | -25.01                  | -6.48                   | 18.53                   | -2.41                       | -15.38                      | -19.23                      |
|          | -21.71                  | -5.22                   | 15.01                   | -2.11                       | -14.03                      | -16.77                      |
|          | -30.50                  | -7.63                   | 19.18                   | -2.76                       | -21.72                      | -25.92                      |
|          | -29.20                  | -5.20                   | 18.26                   | -2.74                       | -18.89                      | -23.43                      |
|          | -23.78                  | -4.37                   | 15.88                   | -2.34                       | -14.62                      | -17.38                      |
|          | -23.33                  | -5.42                   | 16.61                   | -2.22                       | -14.35                      | -17.78                      |
|          | -33.23                  | -9.68                   | 23.46                   | -3.31                       | -22.77                      | -29.77                      |
| 5        | -27.73                  | -9.92                   | 24.30                   | -2.87                       | -16.23                      | -18.79                      |
|          | -30.70                  | -28.89                  | 44.50                   | -3.11                       | -18.20                      | -27.76                      |
|          | -21.03                  | -15.29                  | 22.51                   | -2.29                       | -16.10                      | -17.49                      |
|          | -32.93                  | -8.22                   | 23.63                   | -3.12                       | -20.63                      | -24.86                      |
|          | -31.60                  | -9.38                   | 27.30                   | -3.21                       | -16.89                      | -23.44                      |
|          | -28.51                  | -9.11                   | 21.19                   | -2.79                       | -19.23                      | -24.69                      |

|           |        |        |       |       |        |        |
|-----------|--------|--------|-------|-------|--------|--------|
|           | -29.36 | -8.91  | 24.25 | -3.11 | -17.13 | -21.75 |
|           | -24.72 | -11.81 | 23.57 | -3.15 | -16.11 | -19.20 |
|           | -32.52 | -16.66 | 30.85 | -2.79 | -21.12 | -26.98 |
|           | -29.69 | -8.05  | 22.73 | -2.67 | -17.67 | -22.61 |
|           | -25.82 | -9.57  | 23.44 | -2.87 | -14.81 | -19.61 |
| <b>6</b>  | -31.36 | -14.22 | 28.17 | -2.79 | -20.18 | -26.38 |
|           | -29.74 | -10.70 | 27.02 | -2.93 | -16.35 | -23.06 |
|           | -27.08 | -12.47 | 26.53 | -2.87 | -15.89 | -21.40 |
|           | -25.06 | -8.18  | 21.18 | -2.57 | -14.63 | -19.25 |
|           | -29.57 | -7.53  | 23.66 | -2.89 | -16.33 | -22.04 |
|           | -47.81 | -17.14 | 45.51 | -4.14 | -23.59 | -38.28 |
|           | -39.43 | -9.39  | 28.48 | -3.45 | -23.78 | -33.50 |
|           | -32.56 | -10.25 | 25.91 | -3.18 | -20.08 | -27.39 |
| <b>7</b>  | -38.76 | -7.88  | 24.56 | -3.55 | -25.63 | -34.51 |
|           | -47.56 | -13.61 | 37.61 | -4.05 | -27.60 | -39.18 |
|           | -39.79 | -18.46 | 40.96 | -3.82 | -21.12 | -32.53 |
|           | -38.08 | -13.93 | 36.55 | -3.80 | -19.27 | -30.19 |
|           | -35.37 | -11.39 | 27.04 | -3.40 | -23.13 | -28.00 |
|           | -36.12 | -9.71  | 25.56 | -3.23 | -23.50 | -30.06 |
|           | -39.62 | -4.47  | 22.76 | -3.52 | -24.85 | -32.21 |
|           | -38.94 | -9.23  | 25.38 | -3.44 | -26.22 | -32.73 |
| <b>8</b>  | -37.42 | -8.32  | 24.40 | -3.34 | -24.68 | -31.31 |
|           | -37.44 | -9.25  | 24.40 | -3.20 | -25.50 | -31.69 |
|           | -38.75 | -3.64  | 21.24 | -3.43 | -24.58 | -31.29 |
|           | -44.34 | -7.66  | 26.02 | -3.67 | -29.65 | -36.61 |
|           | -41.67 | -6.82  | 25.62 | -3.72 | -26.60 | -34.47 |
|           | -42.22 | -16.84 | 39.95 | -3.83 | -22.93 | -29.66 |
|           | -48.34 | -7.73  | 31.69 | -4.27 | -28.65 | -36.00 |
|           | -38.72 | -18.78 | 40.31 | -3.84 | -21.04 | -27.80 |
| <b>9</b>  | -42.91 | -13.63 | 37.83 | -3.90 | -22.62 | -31.18 |
|           | -39.96 | -12.36 | 34.37 | -3.51 | -21.45 | -29.20 |
|           | -39.54 | -11.76 | 31.92 | -4.05 | -23.44 | -28.77 |
|           | -38.71 | -12.69 | 31.48 | -3.88 | -23.80 | -27.61 |
|           | -34.04 | -26.37 | 43.52 | -3.66 | -20.54 | -27.83 |
|           | -27.92 | -13.15 | 27.11 | -2.91 | -16.87 | -19.47 |
|           | -27.21 | -11.63 | 27.28 | -2.90 | -14.46 | -18.62 |
|           | -24.09 | -11.99 | 23.48 | -2.84 | -15.43 | -16.75 |
| <b>10</b> | -26.85 | -7.57  | 22.90 | -2.78 | -14.30 | -16.98 |
|           | -24.55 | -10.97 | 21.79 | -2.58 | -16.31 | -18.17 |
|           | -29.32 | -23.33 | 32.33 | -3.03 | -23.36 | -26.15 |
|           | -25.80 | -16.71 | 24.13 | -2.82 | -21.20 | -23.63 |
|           | -23.64 | -10.06 | 20.24 | -2.74 | -16.21 | -16.38 |

|           |        |        |       |       |        |        |
|-----------|--------|--------|-------|-------|--------|--------|
| <b>11</b> | -29.65 | -3.29  | 18.02 | -2.69 | -17.61 | -25.46 |
|           | -27.78 | -3.83  | 13.46 | -2.43 | -20.59 | -24.42 |
|           | -27.22 | -4.43  | 15.06 | -2.44 | -19.03 | -23.91 |
|           | -26.02 | -2.91  | 11.73 | -2.38 | -19.58 | -22.72 |
|           | -27.70 | -3.45  | 11.49 | -2.40 | -22.06 | -25.66 |
|           | -24.20 | -3.39  | 12.27 | -2.31 | -17.64 | -21.12 |
|           | -26.40 | -2.29  | 12.58 | -2.46 | -18.57 | -23.04 |
|           | -28.89 | -4.19  | 13.89 | -2.45 | -21.65 | -26.53 |
| <b>12</b> | -38.44 | -7.62  | 24.58 | -3.12 | -24.60 | -31.02 |
|           | -40.43 | -13.27 | 28.68 | -3.26 | -28.27 | -36.11 |
|           | -37.21 | -8.85  | 27.26 | -3.32 | -22.13 | -30.41 |
|           | -31.46 | -11.90 | 23.20 | -3.13 | -23.29 | -27.11 |
|           | -42.59 | -18.07 | 34.55 | -3.41 | -29.52 | -37.42 |
|           | -39.44 | -16.48 | 35.29 | -3.40 | -24.03 | -34.38 |
|           | -37.62 | -7.75  | 24.69 | -3.27 | -23.94 | -31.62 |
|           | -40.21 | -18.73 | 36.30 | -3.36 | -25.99 | -35.50 |
| <b>13</b> | -26.18 | -11.87 | 26.28 | -2.55 | -14.33 | -18.05 |
|           | -30.30 | -27.38 | 41.00 | -2.54 | -19.22 | -21.11 |
|           | -26.60 | -13.65 | 27.18 | -2.64 | -15.70 | -19.35 |
|           | -23.89 | -16.86 | 29.17 | -2.50 | -14.08 | -16.63 |
|           | -26.30 | -12.68 | 25.90 | -2.53 | -15.61 | -18.37 |
|           | -31.21 | -13.82 | 28.83 | -2.59 | -18.79 | -22.54 |
|           | -28.17 | -12.40 | 26.27 | -2.75 | -17.05 | -21.06 |
|           | -29.06 | -9.95  | 25.23 | -2.49 | -16.28 | -19.95 |
| <b>L1</b> | -47.60 | -13.78 | 34.60 | -4.16 | -30.94 | -40.74 |
|           | -49.48 | -16.24 | 38.52 | -4.20 | -31.39 | -43.32 |
|           | -50.58 | -14.77 | 35.65 | -4.28 | -33.98 | -43.15 |
|           | -52.83 | -14.35 | 38.20 | -4.33 | -33.31 | -45.11 |
|           | -53.15 | -16.38 | 38.48 | -4.44 | -35.49 | -45.29 |
|           | -46.38 | -15.14 | 33.62 | -4.16 | -32.06 | -38.52 |
|           | -46.39 | -15.43 | 32.79 | -3.85 | -32.87 | -41.42 |
|           | -50.90 | -15.89 | 37.97 | -4.29 | -33.10 | -43.90 |
| <b>L2</b> | -44.59 | -10.40 | 31.22 | -3.77 | -27.55 | -38.42 |
|           | -52.73 | -9.64  | 34.57 | -4.32 | -32.12 | -44.09 |
|           | -53.65 | -9.43  | 34.99 | -4.34 | -32.42 | -44.92 |
|           | -50.76 | -8.82  | 32.79 | -4.22 | -31.02 | -42.07 |
|           | -49.55 | -5.43  | 28.25 | -4.06 | -30.79 | -40.54 |
|           | -47.78 | -10.85 | 34.00 | -4.07 | -28.70 | -39.32 |
|           | -51.70 | -8.22  | 33.90 | -4.32 | -30.34 | -41.98 |
|           | -45.20 | -5.65  | 27.34 | -4.03 | -27.54 | -36.85 |
| <b>L3</b> | -42.49 | -9.25  | 24.46 | -3.39 | -30.67 | -37.21 |
|           | -48.38 | -15.55 | 37.39 | -4.14 | -30.68 | -40.24 |

---

|        |        |       |       |        |        |
|--------|--------|-------|-------|--------|--------|
| -51.31 | -10.00 | 31.01 | -3.97 | -34.27 | -45.88 |
| -52.01 | -9.46  | 34.27 | -4.35 | -31.55 | -42.61 |
| -51.54 | -12.27 | 35.56 | -4.26 | -32.52 | -44.03 |
| -54.35 | -13.36 | 36.69 | -4.32 | -35.33 | -47.30 |
| -49.71 | -9.84  | 33.80 | -4.13 | -29.89 | -39.77 |
| -52.53 | -10.44 | 35.57 | -4.29 | -31.69 | -43.45 |

---

**Table S5** Relative binding energies of compound **12** with entropy contributions during 50ns (energies in kcal/mol).

| <b>Frames</b> | $\Delta E_{\text{vdw}}$ | $\Delta E_{\text{EEL}}$ | $\Delta E_{\text{EPB}}$ | $\Delta E_{\text{ENPOLAR}}$ | <b>TAS</b> | $\Delta G_{\text{MM/PBSA}}$ | $\Delta G_{\text{MM/GBSA}}$ |
|---------------|-------------------------|-------------------------|-------------------------|-----------------------------|------------|-----------------------------|-----------------------------|
| 50            | -41.57                  | -16.01                  | 30.75                   | -3.24                       | –          | -30.08                      | -38.23                      |
| 50            | -41.57                  | -16.01                  | 30.75                   | -3.24                       | -16.36     | -13.71                      | -21.86                      |
| 100           | -40.43                  | -13.27                  | 28.68                   | -3.26                       | –          | -28.27                      | -36.11                      |
| 100           | -40.43                  | -13.27                  | 28.68                   | -3.26                       | -19.66     | -8.61                       | -16.45                      |

We calculated the atomic partial charges before docking using the AM1-BCC charges and restrained electrostatic potential (RESP). Then their binding energies were calculated separately, and the results were not much different.

**Table S6** Comparison of MM/PB(GB)SA binding free energies assigning AM1-BCC charges and RESP charges for compound **12** (energies in kcal/mol).

| Compound  | $\Delta E_{\text{vdw}}$ | $\Delta E_{\text{EEL}}$ | $\Delta E_{\text{EPB}}$ | $\Delta E_{\text{ENPOLAR}}$ | $\Delta G_{\text{MM/PBSA}}$ | $\Delta G_{\text{MM/PBSA}}$ |
|-----------|-------------------------|-------------------------|-------------------------|-----------------------------|-----------------------------|-----------------------------|
|           | -38.44                  | -7.62                   | 24.58                   | -3.12                       | -24.60                      | -31.02                      |
|           | -40.43                  | -13.27                  | 28.68                   | -3.26                       | -28.27                      | -36.11                      |
|           | -37.21                  | -8.85                   | 27.26                   | -3.32                       | -22.13                      | -30.41                      |
| <b>12</b> | -31.46                  | -11.90                  | 23.20                   | -3.13                       | -23.29                      | -27.11                      |
| (BCC)     | -42.59                  | -18.07                  | 34.55                   | -3.41                       | -29.52                      | -37.42                      |
|           | -39.44                  | -16.48                  | 35.29                   | -3.40                       | -24.03                      | -34.38                      |
|           | -37.62                  | -7.75                   | 24.69                   | -3.27                       | -23.94                      | -31.62                      |
|           | -40.21                  | -18.73                  | 36.30                   | -3.36                       | -25.99                      | -35.50                      |
|           | -38.27                  | -16.13                  | 33.29                   | -3.37                       | -24.48                      | -31.12                      |
|           | -37.95                  | -17.69                  | 31.45                   | -3.57                       | -27.75                      | -32.89                      |
|           | -36.71                  | -8.67                   | 26.50                   | -3.31                       | -22.19                      | -30.10                      |
| <b>12</b> | -37.20                  | -9.90                   | 27.10                   | -3.29                       | -23.29                      | -29.48                      |
| (RESP)    | -37.39                  | -16.92                  | 31.99                   | -3.51                       | -25.83                      | -31.05                      |
|           | -33.03                  | -8.47                   | 22.57                   | -3.00                       | -21.94                      | -26.93                      |
|           | -35.37                  | -6.67                   | 24.09                   | -3.21                       | -21.15                      | -26.76                      |
|           | -32.89                  | -14.49                  | 28.33                   | -3.16                       | -22.21                      | -27.09                      |



**Table S7** Hydrogen bond interactions in the Mpro-ligand complexes

| <b>compound</b> | <b>Hydrogen Bond</b>       | <b>Lifetime(%)</b> | <b>Distance(Å)</b> |
|-----------------|----------------------------|--------------------|--------------------|
| <b>3</b>        | (UNK307)@O5...H-N(G143)    | 14.78              | 2.53               |
|                 | (UNK307)@O5...H-N(E166)    | 60.22              | 2.37               |
| <b>8</b>        | (UNK307)@O2...H1-OG1(T25)  | 19.28              | 2.08               |
|                 | (UNK307)@O1...HD1-ND1(H41) | 85.10              | 2.67               |
|                 | (UNK307)@N2-H2...OG(S46)   | 15.84              | 2.61               |
| <b>9</b>        | (UNK307)@O2...H-N(G143)    | 53.08              | 2.35               |
|                 | (UNK307)@N5-H51...O (L141) | 8.04               | 2.46               |
| <b>12</b>       | (UNK307)@O2...H-N(G143)    | 16.68              | 2.41               |
|                 | (UNK307)@O2...H-N(G145)    | 21.98              | 2.25               |

**Table S8** Protein–ligand binding energy decomposition of critical residues involved in the formation of Mpro binding pocket (energies in kcal/mol).

| residue | 1     | 2     | 3     | 4     | 5     | 6     | 7     | 8     | 9     | 10    | 11    | 12    | 13    |
|---------|-------|-------|-------|-------|-------|-------|-------|-------|-------|-------|-------|-------|-------|
| T 25    | -1.29 | -0.10 | -1.27 | 0.01  | -1.36 | -0.74 | -0.92 | -1.14 | -0.23 | -0.45 | -0.11 | -0.35 | -0.43 |
| T 26    | -0.07 | -0.01 | -0.16 | 0.01  | -0.05 | -0.26 | -0.50 | -0.04 | -0.01 | -0.80 | 0.00  | -0.03 | -0.10 |
| L 27    | -0.27 | -0.24 | -0.71 | -0.02 | -0.40 | -0.65 | -0.52 | -0.24 | -0.45 | -0.43 | -0.37 | -0.22 | -0.63 |
| P 39    | -0.02 | -0.04 | -0.22 | 0.00  | -0.15 | -0.27 | -0.12 | -0.13 | -0.15 | -0.05 | -0.16 | -0.11 | -0.10 |
| R 40    | -0.06 | -0.07 | -0.34 | 0.01  | -0.03 | -0.44 | -0.08 | -0.31 | -0.25 | 0.01  | -0.21 | -0.20 | -0.05 |
| H 41    | -2.02 | -1.25 | -1.18 | -0.01 | -1.65 | -2.06 | -1.71 | -2.24 | -1.60 | -1.38 | -1.48 | -1.96 | -1.52 |
| V 42    | -0.09 | -0.01 | -0.30 | 0.00  | -0.11 | -0.21 | -0.10 | -0.22 | -0.11 | -0.07 | -0.11 | -0.21 | -0.18 |
| C 44    | -0.29 | -0.02 | -1.09 | 0.00  | -0.77 | -0.51 | -0.18 | -1.62 | -0.81 | -0.12 | -0.12 | -0.40 | -0.08 |
| T 45    | -1.05 | -0.05 | -0.88 | 0.00  | -0.33 | -0.40 | -0.11 | -1.84 | -1.03 | -0.17 | -0.07 | -0.39 | -0.10 |
| S 46    | -0.56 | -0.17 | -1.13 | -0.06 | -0.68 | -0.55 | -0.10 | -0.97 | -0.50 | -0.41 | -0.30 | -0.30 | -0.16 |
| D 48    | -0.01 | 0.03  | -0.19 | 0.00  | -0.15 | -0.07 | -0.04 | -0.38 | -0.26 | 0.00  | -0.06 | -0.11 | -0.03 |
| M 49    | -0.36 | -0.64 | -1.75 | -0.20 | -1.71 | -1.17 | -0.70 | -2.75 | -2.12 | -1.63 | -1.52 | -1.65 | -1.02 |
| P 52    | 0.00  | -0.01 | -0.25 | 0.00  | -0.05 | -0.09 | -0.14 | -0.32 | -0.17 | -0.09 | -0.15 | -0.03 | -0.01 |
| F 140   | -0.03 | -0.13 | 0.00  | -0.33 | 0.00  | -0.02 | -0.12 | 0.00  | -0.24 | 0.00  | -0.01 | -0.12 | -0.08 |
| L 141   | -0.05 | -0.26 | -0.02 | -0.54 | 0.00  | -0.07 | -0.16 | 0.00  | -0.27 | -0.02 | 0.00  | -0.32 | -0.03 |
| N 142   | -2.55 | -2.34 | -0.04 | -1.19 | 0.06  | -0.33 | -0.39 | 0.05  | -0.97 | -0.18 | 0.02  | -0.50 | -0.49 |
| G 143   | -1.71 | -1.36 | -0.28 | -0.11 | 0.00  | -0.27 | -0.19 | -0.02 | -0.20 | -0.20 | -0.04 | -0.18 | -0.50 |
| S 144   | -0.83 | -0.76 | -0.11 | -0.40 | -0.05 | -0.24 | -0.15 | -0.02 | -0.23 | -0.05 | -0.05 | -0.25 | -0.47 |
| C 145   | -1.46 | -1.20 | -0.71 | -0.22 | -0.90 | -0.81 | -0.63 | -0.15 | -0.77 | -0.48 | -0.49 | -0.76 | -1.17 |
| H 163   | -0.51 | -0.29 | -0.07 | -0.48 | -0.04 | -0.21 | -0.09 | -0.05 | -0.95 | -0.07 | -0.07 | -0.18 | -0.29 |
| H 164   | -0.13 | -0.32 | 0.16  | -0.14 | -0.22 | -0.30 | -0.22 | -0.07 | -0.22 | -0.31 | -0.31 | -0.92 | -0.29 |
| M 165   | -0.92 | -2.09 | -0.86 | -1.02 | -0.69 | -0.84 | -1.56 | -0.83 | -2.25 | -1.66 | -1.02 | -2.70 | -1.48 |
| E 166   | -0.22 | -0.52 | 0.18  | -0.81 | 0.05  | -0.18 | -0.18 | 0.09  | -0.41 | -0.49 | 0.03  | -0.72 | -0.39 |
| L 167   | 0.04  | -0.02 | -0.03 | -0.18 | -0.01 | 0.00  | -0.47 | -0.04 | -0.17 | -0.14 | -0.03 | -0.06 | -0.06 |
| P 168   | 0.00  | 0.00  | 0.02  | -0.40 | -0.01 | 0.00  | -0.60 | 0.00  | -0.24 | -0.08 | -0.01 | -0.04 | -0.03 |
| H 172   | -0.11 | -0.31 | -0.01 | -0.40 | 0.00  | -0.05 | -0.21 | -0.01 | -0.26 | -0.02 | -0.02 | -0.17 | -0.08 |
| D 187   | 0.07  | -0.20 | -0.27 | -0.01 | -0.46 | -0.11 | -0.26 | -0.02 | -0.02 | -0.15 | -0.77 | -0.83 | -0.33 |
| R 188   | -0.01 | -0.25 | -0.35 | -0.04 | -0.69 | -0.08 | -0.27 | -0.37 | -0.28 | -0.28 | -0.23 | -0.40 | -0.24 |
| Q189    | -0.04 | -0.46 | -0.62 | -0.52 | -0.35 | -0.30 | -0.86 | -0.41 | -0.40 | -0.66 | -0.53 | -0.69 | -0.34 |

**Table S9** Protein–ligand binding energy decomposition of secondary structures (SS) involved in the formation of Mpro binding pocket (energies in kcal/mol).

| SS      | 1     | 2     | 3     | 4     | 5     | 6     | 7     | 8     | 9     | 10    | 11    | 12    | 13    |
|---------|-------|-------|-------|-------|-------|-------|-------|-------|-------|-------|-------|-------|-------|
| Sheet4  | -1.63 | -0.35 | -2.14 | 0.00  | -1.81 | -1.66 | -1.94 | -1.42 | -0.68 | -1.68 | -0.48 | -0.59 | -1.17 |
| Helix2  | -2.48 | -1.38 | -3.12 | 0.00  | -2.70 | -3.50 | -2.19 | -4.52 | -2.93 | -1.61 | -2.09 | -2.89 | -1.94 |
| ASL1    | -1.98 | -0.85 | -4.20 | -0.27 | -3.69 | -2.27 | -1.09 | -6.26 | -4.09 | -2.31 | -2.10 | -2.48 | -1.32 |
| Loop1   | -6.63 | -6.05 | -1.15 | -2.80 | -0.89 | -1.74 | -1.65 | -0.15 | -2.68 | -0.94 | -0.56 | -2.13 | -2.74 |
| Sheet12 | -1.75 | -3.24 | -0.62 | -2.63 | -0.91 | -1.53 | -2.52 | -0.89 | -4.00 | -2.67 | -1.40 | -4.57 | -2.50 |
| ASL2    | -0.08 | -1.21 | -1.24 | -1.38 | -1.51 | -0.53 | -2.19 | -0.82 | -1.19 | -1.20 | -1.56 | -2.14 | -1.03 |

**Table S10** Pocket occupancy of 13 selected compounds and generated 3 novel lead compounds

| <b>Compound</b> | <b>S1'</b> | <b>S1</b> | <b>S2</b> | <b>S4</b> |
|-----------------|------------|-----------|-----------|-----------|
| <b>1</b>        | 29.80%     | 35.79%    | 34.64%    | -0.23%    |
| <b>2</b>        | 28.45%     | 47.98%    | 16.67%    | 6.89%     |
| <b>3</b>        | 27.90%     | 12.48%    | 50.48%    | 9.14%     |
| <b>4</b>        | 9.21%      | 63.96%    | 14.65%    | 12.18%    |
| <b>5</b>        | 25.63%     | 15.84%    | 45.70%    | 12.84%    |
| <b>6</b>        | 30.81%     | 17.82%    | 47.04%    | 4.33%     |
| <b>7</b>        | 27.11%     | 29.34%    | 26.44%    | 17.11%    |
| <b>8</b>        | 8.77%      | 12.92%    | 72.67%    | 5.64%     |
| <b>9</b>        | 13.79%     | 36.86%    | 43.38%    | 5.98%     |
| <b>10</b>       | 24.34%     | 27.77%    | 36.53%    | 11.36%    |
| <b>11</b>       | 15.25%     | 21.95%    | 45.12%    | 17.69%    |
| <b>12</b>       | 14.24%     | 38.39%    | 34.06%    | 13.31%    |
| <b>13</b>       | 33.52%     | 29.73%    | 27.86%    | 8.88%     |
| <b>L1</b>       | 14.41%     | 17.06%    | 25.14%    | 43.38%    |
| <b>L2</b>       | 11.14%     | 15.40%    | 39.62%    | 33.84%    |
| <b>L3</b>       | 7.91%      | 17.06%    | 39.24%    | 35.79%    |

## Part 4: Physicochemical properties and ADME analysis

Physicochemical and ADME characteristics of these inhibitors for Mpro, derived using the software SwissADME:

**Table S11** Physicochemical properties of these compounds.

| Ligand    | MW    | Natoms | Nrotb | H-bond acceptor | H-bond donor | Molar Refractivity | TPSA  | LogP | LogS | Lipinski |
|-----------|-------|--------|-------|-----------------|--------------|--------------------|-------|------|------|----------|
| <b>1</b>  | 289.4 | 20     | 6     | 3               | 2            | 77.5               | 85.6  | 1.5  | -2.8 | +        |
| <b>2</b>  | 285.1 | 16     | 4     | 4               | 1            | 61.9               | 63.6  | 1.8  | -3.0 | +        |
| <b>3</b>  | 516.7 | 37     | 6     | 6               | 3            | 146.3              | 104.1 | 0.8  | -6.1 | +        |
| <b>4</b>  | 265.3 | 20     | 3     | 3               | 1            | 77.1               | 54.9  | 2.4  | -3.1 | +        |
| <b>5</b>  | 293.3 | 21     | 4     | 5               | 2            | 72.8               | 72.6  | 2.4  | -3.7 | +        |
| <b>6</b>  | 259.3 | 18     | 2     | 1               | 2            | 81.9               | 80.2  | 2.0  | -2.9 | +        |
| <b>7</b>  | 390.4 | 28     | 5     | 8               | 6            | 100.0              | 139.8 | 1.8  | -2.9 | +        |
| <b>8</b>  | 322.4 | 24     | 5     | 4               | 2            | 94.3               | 70.5  | 2.9  | -4.2 | +        |
| <b>9</b>  | 408.5 | 30     | 5     | 5               | 2            | 117.7              | 96.2  | 2.9  | -3.7 | +        |
| <b>10</b> | 273.3 | 20     | 2     | 4               | 3            | 78.1               | 100.8 | 2.1  | -2.0 | +        |
| <b>11</b> | 230.1 | 14     | 2     | 1               | 2            | 67.0               | 36.4  | 1.8  | -2.4 | +        |
| <b>12</b> | 319.4 | 22     | 6     | 4               | 2            | 88.7               | 115.5 | 2.6  | -2.5 | +        |
| <b>13</b> | 252.2 | 18     | 4     | 5               | 1            | 67.2               | 137.7 | 0.0  | -1.4 | +        |
| <b>L1</b> | 477.4 | 35     | 4     | 8               | 2            | 127.0              | 126.1 | 2.9  | -3.8 | +        |
| <b>L2</b> | 423.4 | 31     | 3     | 7               | 1            | 115.5              | 105.8 | 3.0  | -3.8 | +        |
| <b>L3</b> | 423.4 | 31     | 3     | 7               | 1            | 115.5              | 105.8 | 2.9  | -3.8 | +        |

**Table S12** ADME characteristics of these compounds.

| Ligand | GI   | BBB | P-gp | CYP1A2 | CYP2C19 | CYP2C9 | CYP2D6 | CYP3A4 | LogKp<br>(cm/s) |
|--------|------|-----|------|--------|---------|--------|--------|--------|-----------------|
| 1      | high | -   | +    | -      | -       | -      | -      | +      | -6.91           |
| 2      | high | +   | -    | +      | +       | -      | -      | -      | -6.45           |
| 3      | high | -   | +    | -      | -       | -      | -      | +      | -5.54           |
| 4      | high | +   | -    | +      | -       | -      | -      | -      | -6.35           |
| 5      | high | +   | -    | +      | +       | +      | +      | -      | -5.98           |
| 6      | high | -   | -    | +      | +       | -      | -      | -      | -6.56           |
| 7      | high | -   | +    | -      | -       | -      | -      | -      | -7.95           |
| 8      | high | +   | -    | +      | +       | +      | +      | +      | -5.87           |
| 9      | high | -   | +    | -      | -       | +      | -      | +      | -7.40           |
| 10     | high | -   | -    | -      | -       | -      | -      | -      | -7.80           |
| 11     | high | +   | -    | -      | -       | -      | -      | -      | -6.59           |
| 12     | high | -   | +    | -      | -       | -      | -      | -      | -7.37           |
| 13     | high | -   | -    | -      | -       | -      | -      | -      | -7.85           |
| L1     | high | -   | +    | -      | -       | +      | -      | -      | -7.49           |
| L2     | high | -   | +    | -      | -       | +      | -      | -      | -7.68           |
| L3     | high | -   | +    | -      | -       | +      | -      | -      | -7.68           |

## Part 5: Simplified Molecular Input Line Entry System

Table S13 SMILES of 13 input compounds.

| Compound | SMILES                                                                             |
|----------|------------------------------------------------------------------------------------|
| 1        | <chem>O=C(CS(=O)C(c1ccccc1)c1ccccc1)NO</chem>                                      |
| 2        | <chem>BC(=CC(=O)O)C(=O)c1ccc(OC)cc1</chem>                                         |
| 3        | <chem>CC(=O)OC1CC2(C)C(CC(O)C3C4(C)CCC(O)C(C)C4CCC32C)C1=C(CCC=C(C)C)C(=O)O</chem> |
| 4        | <chem>CC(C)NC(=O)c1ccc(C#Cc2ccncc2)cn1</chem>                                      |
| 5        | <chem>CCc1cc(O)c(Oc2ccc(C(N)=O)cc2F)cc1F</chem>                                    |
| 6        | <chem>CN1C(=O)C(Cc2c[nH]c3ccccc23)NC1=S</chem>                                     |
| 7        | <chem>OCC1OC(Oc2cc(O)cc(C=Cc3ccc(O)cc3)c2)C(O)C(O)C1O</chem>                       |
| 8        | <chem>CN(C)c1cccc(Oc2cnc(Nc3cccc(O)c3)nc2)c1</chem>                                |
| 9        | <chem>Cc1cc(C(C)Nc2ccccc2C(=O)O)c2nc(N3CCOCC3)cc(=O)n2c1</chem>                    |
| 10       | <chem>CC(=Nc1ccccc1N)c1c(C)cc(=O)n(O)c1O</chem>                                    |
| 11       | <chem>Clc1cccc(Cl)c1NC1=NCCN1</chem>                                               |
| 12       | <chem>O=C(NCC(=O)N1CCCCC1)Nc1ccc2nmsc2c1</chem>                                    |
| 13       | <chem>NC(=O)c1cc(N2CC2)c([N+](=O)[O-])cc1[N+](=O)[O-]</chem>                       |
| L1       | <chem>Cc1cc(CNc2ccccc(F)c2C(=O)O)c2nc(N3CCOC(=N)C3)c(F)c(=O)n2c1</chem>            |
| L2       | <chem>Cc1cc(Cn2oc(=O)c3ccc(F)cc32)c2nc(N3CCOC(=N)C3)cc(=O)n2c1</chem>              |
| L3       | <chem>Cc1cc(Cn2oc(=O)c3ccccc(F)c32)c2nc(N3CCOC(=N)C3)cc(=O)n2c1</chem>             |
